# Supplementary material for: Pathogenic variants in SMARCA1 cause an X-linked neurodevelopmental disorder modulated by NURF complex composition
Source: PubMed Central journal article supplement (PMC10571636; doi:10.21203/rs.3.rs-3317938/v1), 2023-09-29
Supplement: NIHPPrs3317938v1-supplement-1.pdf [file NIHPPrs3317938v1-supplement-1.pdf]

## Supplementary Files

This is a list of supplementary files associated with this preprint. Click to download.

- [MirzaaetalSupplInfo.pdf](#)
